# Supplementary material
Source: PubMed Central journal article supplement (PMC4347247)
Supplement: JCI76539sd.pdf [file JCI76539sd.pdf]

# Suppl. Figure 1

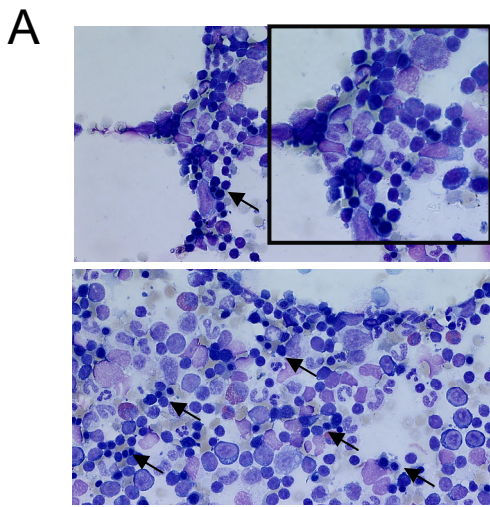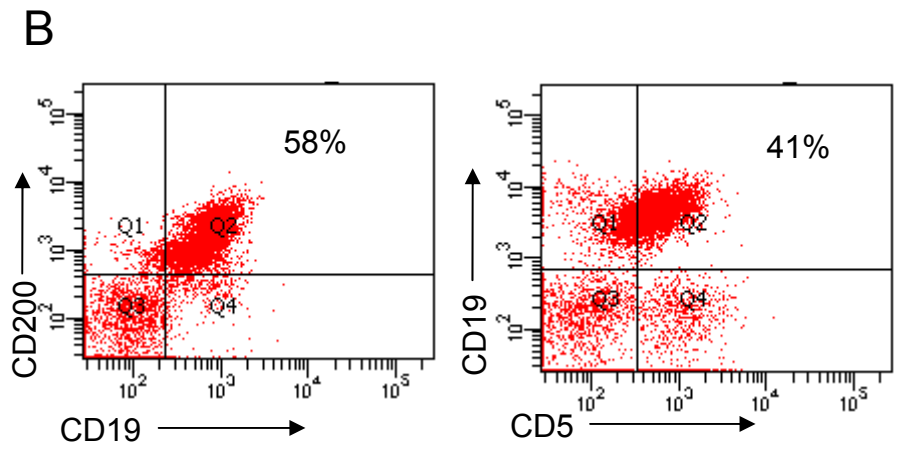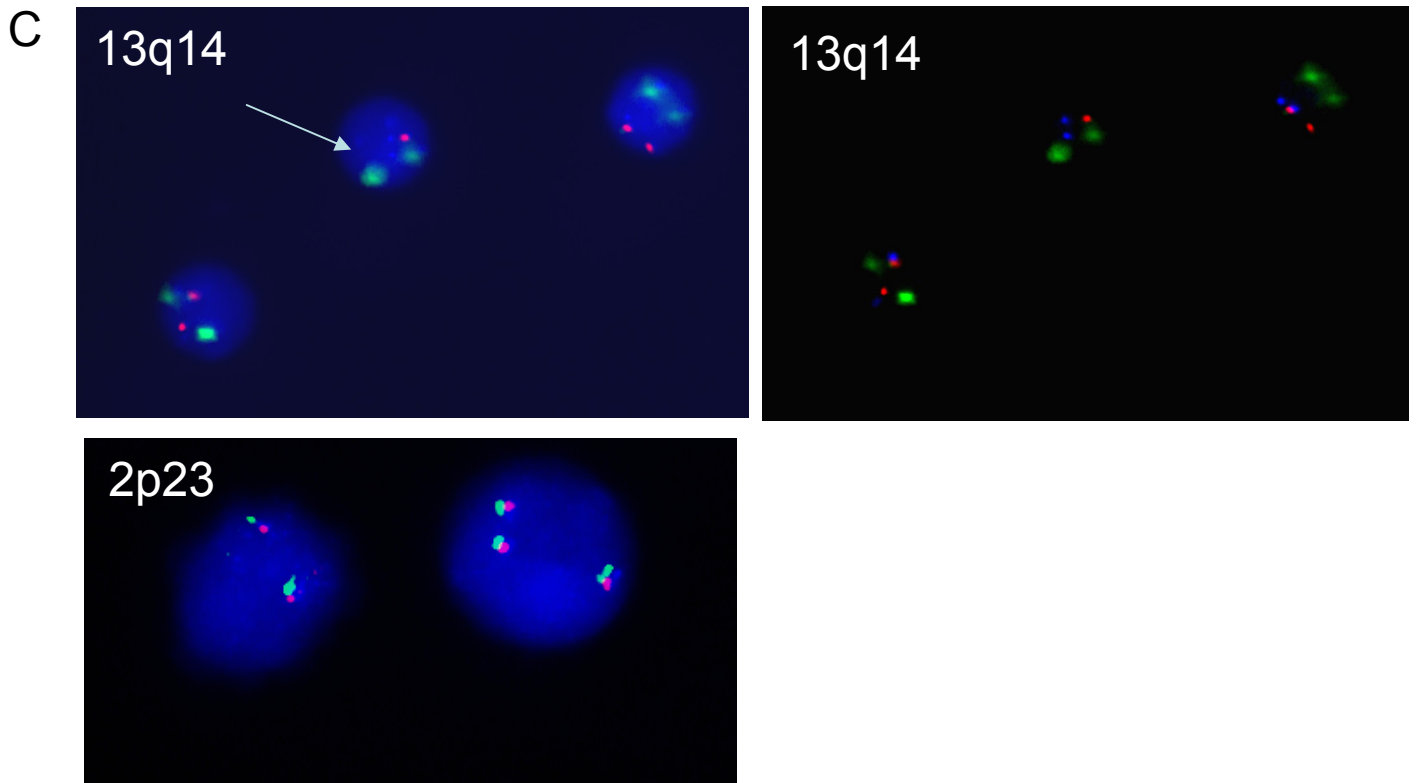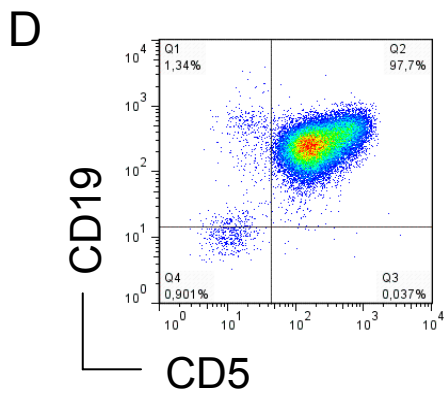

# Suppl. Figure 2

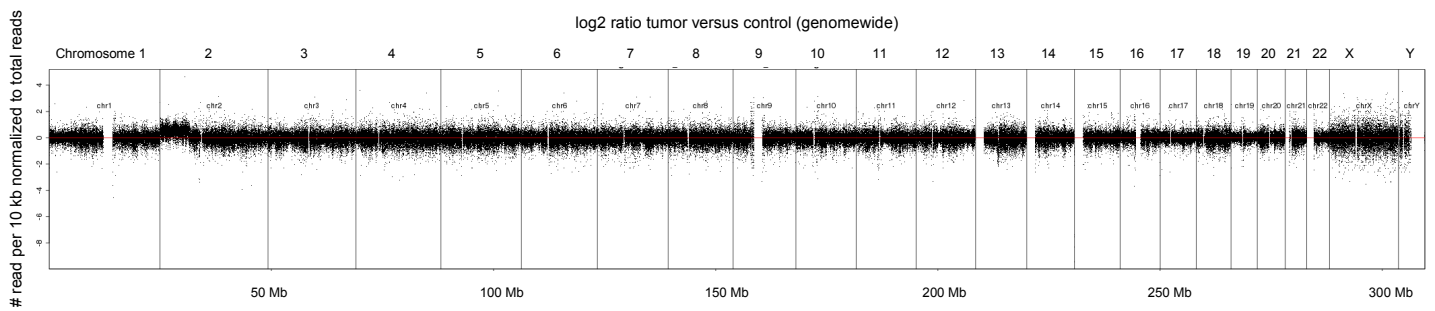

| start     | stop      | event_type    | Chromosome arm | genes                                                                                                                                                                           |
|-----------|-----------|---------------|----------------|---------------------------------------------------------------------------------------------------------------------------------------------------------------------------------|
| 49580147  | 49796568  | deletion      | 13q            | MLNR;FNDC3A<br>ARL11;CTAGE10P;MIR16-1;MIR15A;ST13P4;CDADC1;SETDB2;PHF11;RCBTB1;EBPL;C13orf1;TRIM13;DLEU1;GUCY1B2;FAM124A;SERPINE3;INTS6;CAB39L;DLEU2;KCNRG;RNASEH2B;DLEU7;KPNA3 |
| 49839873  | 51969726  | deletion      | 13q            |                                                                                                                                                                                 |
| 106322296 | 106539572 | deletion      | 14q            | ADAM6;KIAA0125                                                                                                                                                                  |
| 5245315   | 5865099   | amplification | 2p             | SOX11                                                                                                                                                                           |
| 22786727  | 23177123  | deletion      | 22q            | PRAME;GGTLC2;MIR650;ZNF280B;ZNF280A;LOC648691;POM121L1P                                                                                                                         |

| Chromosome | Position  | Gene     | Exonic classification | Annovar transcripts                                                | Cytoband |
|------------|-----------|----------|-----------------------|--------------------------------------------------------------------|----------|
| 1          | 162344365 | C1orf111 | nonsynonymous SNV     | C1orf111:NM_182581:exon3:c.C259T:p.R87W,                           | 1q23.3   |
| 1          | 175365689 | TNR      | nonsynonymous SNV     | TNR:NM_003285:exon5:c.G1231T:p.V411L,                              | 1q25.1   |
| 1          | 226426724 | LIN9     | nonsynonymous SNV     | LIN9:NM_173083:exon12:c.T1241C:p.L414P,                            | 1q42.12  |
| 4          | 187172721 | KLKB1    | nonsynonymous SNV     | KLKB1:NM_000892:exon9:c.G949A:p.V317I,                             | 4q35.2   |
| 5          | 146435290 | PPP2R2B  | nonsynonymous SNV     | PPP2R2B:NM_181676:exon1:c.G17A:p.R6H,                              | 5q32     |
| 6          | 47647958  | GPR111   | nonsynonymous SNV     | GPR111:NM_153839:exon6:c.C419G:p.P140R,                            | 6p12.3   |
| 12         | 45784240  | ANO6     | nonsynonymous SNV     | ANO6:NM_001142678:exon12:c.T1291C:p.C431R,ANO6:NM_001142680:exon13 | 12q12    |
| 14         | 23415771  | HAUS4    | nonsynonymous SNV     | HAUS4:NM_017815:exon10:c.G1055A:p.R352Q,HAUS4:NM_001166269:exon10  | 14q11.2  |
| 17         | 18145834  | LLGL1    | nonsynonymous SNV     | LLGL1:NM_004140:exon21:c.C3008T:p.P1003L,                          | 17p11.2  |
| X          | 3239036   | MXRA5    | nonsynonymous SNV     | MXRA5:NM_015419:exon5:c.G4690A:p.D1564N,                           | Xp22.33  |

# Suppl. Figure 3

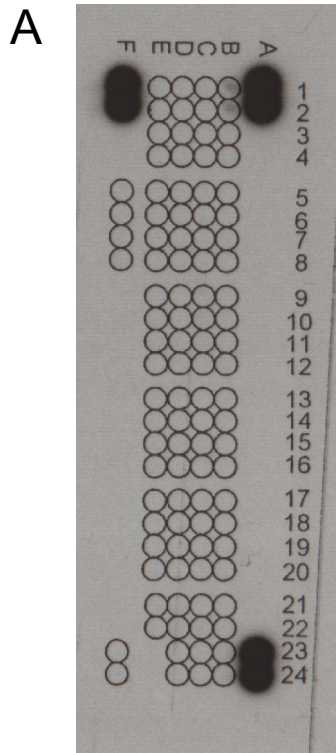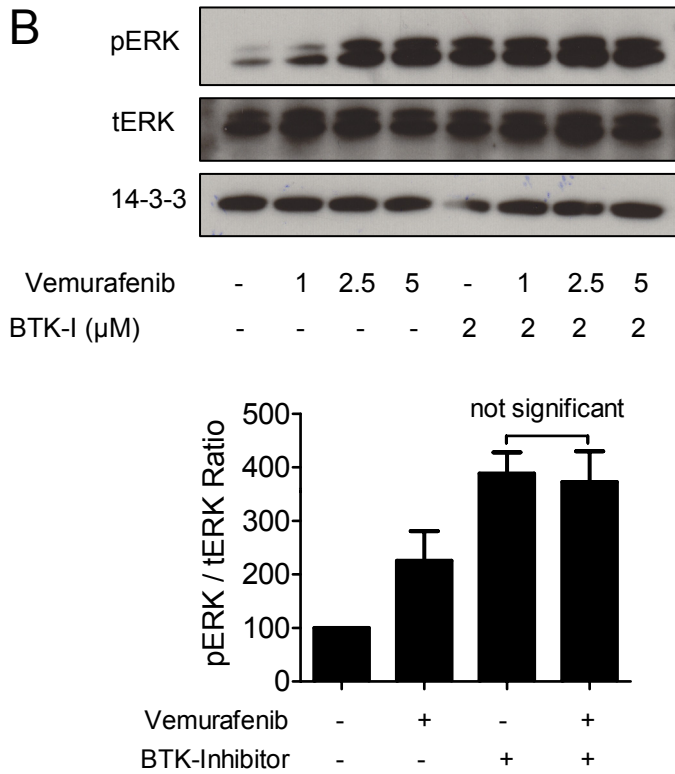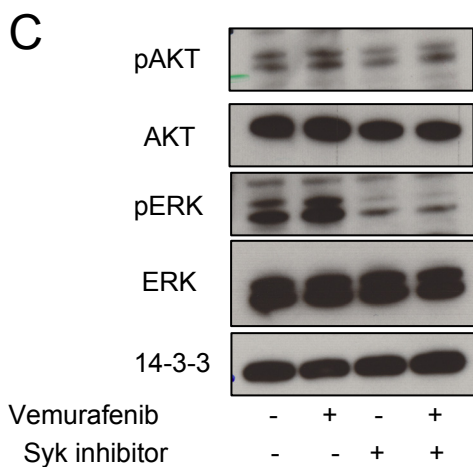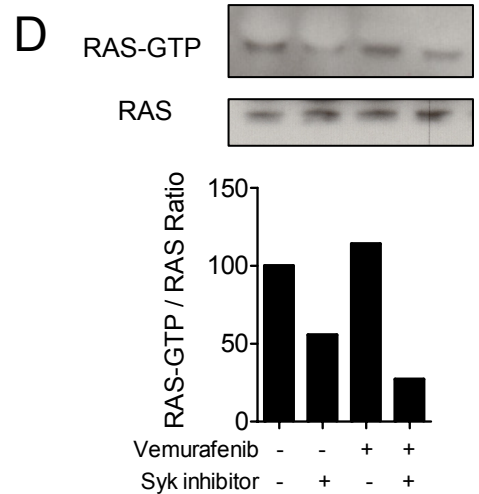

(A) Primary CLL cells from the melanoma patient were highly purified (>97% CD19<sup>+</sup>CD5<sup>+</sup>) and phosphorylation of different RTKs (n=49, some RTKs are in duplicate) was analyzed. No RTK phosphorylation was identified. (B) Western blot analysis for pERK and tERK of the protein lysate of at the indicated concentrations of Vemurafenib (2.5  $\mu$ M), SYK inhibitor (R406, 1  $\mu$ M) or BTK inhibitor (Ibrutinib, 2  $\mu$ M) and quantification of the protein amounts of the described groups are displayed. The experiment was performed three times with similar results. (C) Primary CLL cells were exposed to vemurafenib, SYK inhibitor (R406, 1  $\mu$ M) or DMSO as control at the indicated concentrations and the resulting western blot and the pAKT/tAKT ratios pooled from 4 independent western blot analyses are shown. (D) Primary CLL cells were exposed to vemurafenib, Syk inhibitor (R406, 1  $\mu$ M) or DMSO as control at the indicated concentrations and the resulting western blot and the RAS-GTP/tRAS ratios are shown.

### Supplementary Figure 1: Hematopathological findings

A: Bone marrow aspirate of the patient while being under vemurafenib treatment is shown at a magnification of x400. The insets show the aspirate at higher magnification (x600). Arrows indicate areas with lymphocytic infiltration.

B: Immunophenotyping of the white blood cells during vemurafenib treatment revealed a CD19<sup>+</sup>CD200<sup>+</sup> population that could also be seen as CD19<sup>+</sup>CD5<sup>+</sup> cells

C: FISH analysis of the PBMCs of the patient while being under vemurafenib treatment. Left image: three interphase nuclei with DAPI as DNA counterstain. Two of them have two red signals for 13q14.3 and two green signals for centromere of chromosome 12. One nucleus with deletion 13q14 had only one red signal for 13q14.3 and two green signals for 12 centromeres (white arrow). Right image: the same picture without filter for DAPI counterstain. Two blue signals for 13q34 LAMP1 are present in all three interphase nuclei indicating a deletion of 13q14.3 and not monosomy 13. 13q14.3 DLEU-SpectrumOrange, 13q34LAMP1: Aqua (blue), 12cen: SpectrumGreen. For detection of 2p23 Vysis LSI ALK (2p23) (Abbott, Wiesbaden) was used.

D. CD19<sup>+</sup>CD5<sup>+</sup> cells obtained from the patient were highly purified (>97%) by MACS enrichment with CD5 and CD19 beads.

### Supplementary Figure 2: Whole-exome sequencing results

CLL developing under BRAF inhibition showed somatically acquired copy number variations and single nucleotide variants as summarized. Copy number aberrations included a focal deletion on 13q14 including the mir15/16 and DLEU1/2 locus and a small amplification on chromosome 2p, validated by FISH.

### Supplementary Table 1: CLL is not commonly found in patients under Vemurafenib treatment

| ID | Age | Gender | Treatment with Vemurafenib (months) | Detection of CD5 <sup>+</sup> CD19 <sup>+</sup> cells in peripheral blood | Increased leukocyte count under Vemurafenib |
|----|-----|--------|-------------------------------------|---------------------------------------------------------------------------|---------------------------------------------|
| 01 | 41  | female | 2.5                                 | no                                                                        | no                                          |
| 02 | 70  | male   | 5                                   | no                                                                        | no                                          |
| 03 | 63  | male   | 4                                   | no                                                                        | no                                          |
| 04 | 40  | female | 5                                   | no                                                                        | no                                          |
| 05 | 73  | female | 4                                   | no                                                                        | no                                          |
| 06 | 64  | male   | 1                                   | no                                                                        | no                                          |
| 07 | 51  | male   | 2                                   | no                                                                        | no                                          |

**Supplementary Table 2: Sequencing for mutations in CLL cells**

|                       |                   |                   |                       |                     |
|-----------------------|-------------------|-------------------|-----------------------|---------------------|
| BRAF exons 11 and 15  | KRAS exon 2 and 3 | NRAS exon 2 and 3 | EZH2 exon 16          | MYD88_exons 3 and 5 |
| SF3B1 exons 14 and 15 | TP53 exons 4-10   | NOTCH1 exon 34    | PIK3CA exons 9 and 20 |                     |

No mutations were found in the sequencing analysis of these genes with CD19<sup>+</sup>CD5<sup>+</sup> CLL cells.

**Suppl. Table 3 Characteristics of the patients and the CLL cells**

| #ID | Sex    | Age | Rai stage | IgVH | Genetic aberrations in CLL cells |
|-----|--------|-----|-----------|------|----------------------------------|
| 1   | male   | 71  | 0         | um   | del 13q14                        |
| 2   | male   | 70  | III       | m    | del 17p13, trisomy12             |
| 3   | female | 81  | IV        | m    | trisomy12, del 13q14             |
| 4   | female | 73  | II        | um   | del 17p13, del 13q14             |
| 5   | male   | 51  | II        | um   | del 11q22, del 13q14             |
| 6   | male   | 50  | I         | m    | trisomy12                        |
| 7   | male   | 57  | II        | m    | trisomy12, del 13q14             |
| 8   | male   | 81  | I         | um   | del 17p13                        |
| 9   | female | 77  | II        | m    | trisomy12, del 13q14             |
| 10  | male   | 80  | III       | um   | del 11q22, del 13q14             |

Abbreviations: um = unmutated Immunoglobulin Variable (IgVH) region, m = mutated IgVH, del = deletion, CLL = chronic lymphocytic leukemia
